# Supplementary material for: Biocompatible 3D printed polymers via fused deposition modelling direct C2C12 cellular phenotype in vitro
Source: Royal Society of Chemistry journal article supplement (doi:10.1039/c7lc00577f), 2017-01-01
Supplement: c7lc00577f1.pdf [file c7lc00577f1.pdf]

## Supplementary Material

### 1. Aquarium glue biocompatibility

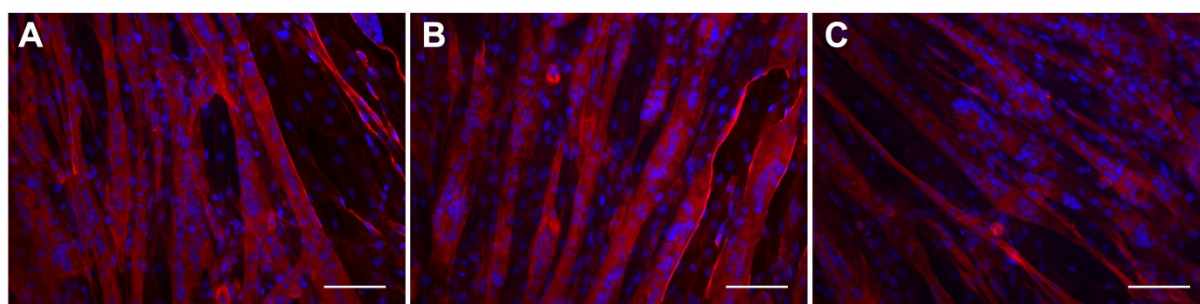

Fig.S1. Morphological staining of the actin cytoskeleton (red) and nucleic DNA (blue).  $C_2C_{12}$  cultured in either (A) control, (B) directly with aquarium glue or (C) in aquarium glue chemical leachate at DM120 hrs. Scale bars = 100  $\mu\text{m}$ .

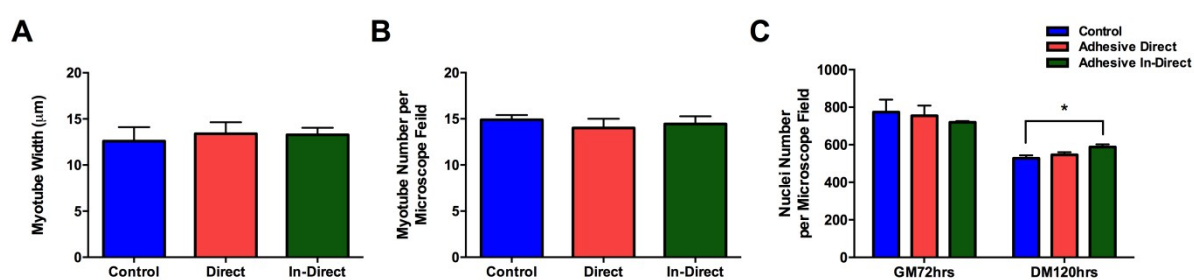

Fig.S2. (A) Myotube width of  $C_2C_{12}$  cultured in either control, directly with aquarium glue or within aquarium glue chemical leachate at DM120 hrs. (B) Myotube number (C) Nuclei number. Data presented as mean  $\pm$  SD from  $n=1$  experimental repeat. \* one-way ANOVA/non-parametric equivalent  $P \leq 0.05$ .
